# Supplementary material for: NIR emissive probe for fluorescence turn-on based dead cell sorting and in vivo viscosity mapping in C. elegans
Source: Royal Society of Chemistry journal article supplement (doi:10.1039/d4tb01945h), 2024-11-12
Supplement: d4tb01945h1.pdf [file d4tb01945h1.pdf]

1 **Supporting information for**

2

3 **NIR emissive probe for fluorescence turn-on based dead cell sorting and *in-***  
4 ***vivo* viscosity mapping in *C. elegans***

5 Goraksha T. Sapkal<sup>1†</sup>, Farhan Anjum<sup>2‡</sup>, Abdul Salam<sup>1§</sup>, Bodhidipra Mukherjee<sup>2§</sup>, Shilpa Chandra<sup>3</sup>, Purabi  
6 Bala<sup>1</sup>, Richa Garg<sup>1</sup>, Shagun Sharma<sup>1</sup>, Kush Kaushik<sup>1</sup>, Chayan Kanti Nandi<sup>1\*</sup>

7  
8 <sup>1</sup>School of Chemical Sciences, Indian Institute of Technology Mandi, Mandi, HP-175075, India

9 <sup>2</sup>School of Biosciences and Bioengineering, Indian Institute of Technology Mandi, Mandi, HP-175075,

10 India

11 <sup>3</sup>Indian Knowledge System and Mental Health Applications Centre, Indian Institute of Technology

12 Mandi, Mandi, H.P-175075. India

13 <sup>†</sup>Goraksha T. Sapkal and Farhan Anjum have first equal contribution to this work

14 <sup>#</sup>Abdul Salam and Bodhidipra Mukherjee have second equal contributions to this work

15 \* **Corresponding Author Email:** [chayan@iitmandi.ac.in](mailto:chayan@iitmandi.ac.in)

16

17 **CONTENTS:**

18 **Materials and Methods**

19 **Experimental Results**

20 **Scheme Sc1:** Synthesis of Cy-Cl probe.

21 **Figure S1-S5:** <sup>1</sup>H NMR, <sup>13</sup>C NMR, and mass spectra of all candidate probes.

22 **Figure S6:** Absorption spectra in water and glycerol.

23 **Figure S7:** Viscosity response of Cy-Cl in various pH.

24 **Figure S8:** Emission spectra of Cy-Cl probe at 639 nm excitation.

25 **Figure S9:** Dead cell staining in the presence of live cells.

26 **Figure S10:** Sensing of different cations and biomolecules.

27 **Figure S11:** Cytotoxicity estimations of Cy-Cl probe.

28 **Figure S12:** ROS analysis against H<sub>2</sub>O<sub>2</sub>.

29 **Figure S13:** Live to dead cell imaging 6 hours HeLa cells.

30 **Figure S14:** Live to dead cell imaging 6 hours HEK 293A cells.

31 **Figure S15:** Live to dead cell imaging 12 hours Hep G2 cells.

32 **Figure S16:** Pore formation in HeLa cells with 1% triton X-100.

33 **Figure S17:** Root image of tomato seedlings used for plant cell study.

## 14 Materials and Methods

35 All the chemicals were purchased from professional reagent suppliers. Cyclohexanone, 2,3,3  
36 trimethyl indole, 1,4 butyl sulfonate, phosphorus oxychloride, dimethyl formamide,  
37 dichloromethane, and 1,2 dichloro benzene were collected from sigma Aldrich Pvt. Ltd and  
38 SD fine limited. The column chromatography solvents hexane, methanol, and dichloromethane  
39 were collected from Rankem and Finar Pvt. Ltd. All photophysical experiments were carried  
40 out in deionized distilled water.

### 41 NMR Spectra Measurement

42 All synthesized intermediate compounds and Cy-Cl probes were characterized using A Jeol  
43 ECX-500 (500 MHz for  $^1\text{H}$  and  $^{13}\text{C}$  spectra using different deuterated solvents). After weighing  
44 the 10-12 mg sample, the respective deuterated solvents, such as  $\text{CD}_3\text{OD}$ ,  $\text{DMSO-D}_6$ , and  
45  $\text{CD}_3\text{OD}$ , were added to the sample to record the NMR.

### 46 High-Resolution Mass Spectrometry (HRMS)

47 We prepare 1 mg Cy-Cl probe in 1 mL of HPLC grade methanol and by injecting 0.1-0.2 mL  
48 diluted samples in a capillary at 4500 V, high-resolution mass spectrum data were obtained  
49 using a Bruker Daltonik GmbH (Model - Impact HD, USA) instrument in positive mode. At  
50 2000 V charging voltage, spectra from 100 m/z to 1250 m/z were seen in active mode. The  
51 pressure for dry nebulization was set at 0.5 bars.

### 52 Fluorescence Lifetime

53 The fluorescence lifetime and time-resolved anisotropy decays were assessed using the Horiba  
54 scientific Delta Flex TCSPC system with Pulsed LED Sources. Ludox has been employed as  
55 an instrument response function for spectral value deconvolution. By tri-exponentially fitting  
56 the photon decays in different channels with a chi-squared value  $< 1.2$ , we measured the  
57 fluorescence lifetime of various concentrations of the viscosity-based water-glycerol mixture.

58

### 59 UV-Visible and Steady-State Fluorescence

60 The absorption and emission spectra of the probe were recorded using Shimadzu UV-2450 and  
61 Cary Eclipse spectrophotometer. All photophysical experiments were performed at room  
62 temperature. A slit width kept constant, i.e. 10 nm, was used for excitation and emission in the  
63 fluorescence spectrophotometer.

## 64 **Absolute Quantum Yield**

65 We performed the absolute quantum yield measurements using the integrating sphere approach  
66 on a Quanta-φ spectrofluorometer (Horiba) instrument. The probe was ensured to have  
67 absorbance < 0.1 at all excitation wavelengths to reduce any artifacts. For a particular  
68 wavelength, e.g., for 775 nm excitation, an emission spectrum was taken from 765 nm to 850  
69 nm (scattering and emission part combined) first for solvent (water and glycerol) and then with  
70 probe. The same settings were employed for both measurements.

## 71 **Cell Culture**

72 HeLa, HEK 293A, and Hep G2 cell lines were used for the present study. The cells were  
73 separately maintained in DMEM (Dulbecco's minimal essential media, Gibco Invitrogen  
74 corporation) containing 10% fetal bovine serum (Gibco-invitrogen corporation) and 1% Anti-  
75 Anti (penicillin-streptomycin), 1% HEPES, and 1% NEA (Gibco Invitrogen corporation) and  
76 incubated in a humidified incubator at 37 °C and 5% CO<sub>2</sub>. After growing cells in the T-25 flask,  
77 healthy cells were taken from the T-25 flask and seeded on the coverslip into 6-well plates.  
78 Each well was supplemented with 2 mL of the growth medium, and cells were allowed to grow  
79 overnight for proper adherence. An optical microscope was used to examine the growth and  
80 attachment of the cells to the coverslips.

## 81 **Treatment with the Cy-CI Probe**

82 Once the cells had adequately adhered to the coverslip, the probe (60 μM) was incubated in  
83 HeLa, HEK 293A, and Hep G2 cell lines for 1 hour. Then, the cells were washed three times  
84 with PBS buffer to remove any unbound probes and fixed by incubating with 4%  
85 paraformaldehyde solution in 1X PBS buffer for 10 minutes. After that, the coverslips were  
86 mounted on a glass slide using a drop of glycerol, and the edges were sealed with wax before  
87 imaging.

## 88 **Cell Death Induction**

89 **Apoptosis by H<sub>2</sub>O<sub>2</sub>:** HeLa cells were seeded in confocal 35 mm dishes and kept for proper  
90 adherence. Once the cells were adhered and adopted proper morphology, cells were incubated  
91 with a probe (60 μM) for 1 hour. Further cells were washed with 1X PBS and replenished with  
92 fresh media containing 10 mM of H<sub>2</sub>O<sub>2</sub>. The live cell to dead cell process was monitored for 6-  
93 12 hours.

94 **Ferroptosis by Sulfasalazine and Erastin:** HeLa cells were seeded in confocal 35 mm dishes  
95 and kept for proper adherence. Once the cells were adhered and adopted proper morphology,  
96 cells were incubated with a probe (60  $\mu$ M) for an hour. Further cells were washed with 1X PBS  
97 and replenished with fresh media containing 30  $\mu$ M of sulfasalazine. The cell death process  
98 was monitored for 12 hours<sup>1,2</sup>. For erastin-induced ferroptosis, a 10  $\mu$ M concentration of erastin  
99 was used<sup>3,4</sup>.

## 100 **Confocal Microscopy**

101 Nikon Eclipse Ti inverted microscope was used for the confocal microscopy, and images were  
102 acquired using Nikon Nis-Element software. The cell samples were excited by a 639 nm laser,  
103 and the emission was collected using the appropriate filter sets. The colocalization study was  
104 performed using a 60x (1.40 NA) oil immersion objective.

## 105 **Live to Dead Cell Imaging with Confocal Microscopy**

106 The cells (HeLa, HEK 293A, and Hep G2) were seeded into the 35-mm confocal dishes and  
107 kept for proper adherence in the humidified CO<sub>2</sub> incubator. Then, cells were incubated with a  
108 Cy-Cl probe (60  $\mu$ M) for 1 hour, transferred to a humidified benchtop confocal CO<sub>2</sub> incubator,  
109 and images were taken. To initiate the apoptosis inside the cells 10 mM of H<sub>2</sub>O<sub>2</sub> was added to  
110 the confocal dishes, and then time-lapse imaging was started for 6 hours for HeLa and HEK  
111 293A cells and 12 hours for Hep G2 cells.

## 112 **Cell viability assay**

113 Cell viability of HeLa cells against Cy-Cl probe was performed using an XTT assay. First cells  
114 were maintained as per the National Centre for Cell Science (NCCS) Pune, Maharashtra, India  
115 guidelines and seeded in 96-well plates with seeding density  $2.5 \times 10^3$  cells at each well. After  
116 proper adherence and reaching proper confluency, the cells were exposed to Cy-Cl for 6, 12  
117 and 24 hours respectively. After Cy-Cl probe incubation, an XTT reagent, along with an  
118 electron coupler, were added to each well and incubated for 4 hours. The optical density of  
119 each well containing cellular media, XTT reagent, and electron coupler was taken using the  
120 Tecan Infinite M200 PRO multi-plate reader. The optical density was collected at 450 nm with  
121 a reference read at 690 nm. The final absorbance values concerning control and blank samples  
122 were analyzed for cell viability measurement.

## 123 **ROS Estimation**

124 ROS Estimation was performed against the probe and H<sub>2</sub>O<sub>2</sub>, mainly to check the amount of  
125 ROS generated against H<sub>2</sub>O<sub>2</sub>, which was used to initiate the apoptosis. HeLa cells were seeded  
126 into a 96-well plate and allowed to grow properly. After proper adherence, cells were washed  
127 with 1X-PBS and stained with 10 μM of 2',7'-dichlorodihydrofluorescein diacetate (DCFH-  
128 DA) in 1% serum media for 30 minutes. Then, the cells were washed and incubated with a Cy-  
129 Cl probe and H<sub>2</sub>O<sub>2</sub> for 12 hours. The generated ROS was spectrophotometrically analyzed by  
130 exiting DCFH-DA at 485 nm and collecting emissions at 535 nm.

### 131 **Plant Cell Staining**

132 Tomato seedlings (*Solanum lycopersicum*) were used in this study. The seeds were surface-  
133 sterilized with 70% ethanol and thoroughly rinsed with sterile distilled water. The sterilized  
134 seeds were germinated on ½ Murashige and Skoog (MS) agar plates. The plates were sealed to  
135 maintain sterility, and the seedlings were grown under controlled conditions at 21°C with a  
136 photoperiod of 16 hours of light and 8 hours of darkness. Two-week-old tomato seedlings were  
137 used for the experiment.

### 138 ***C. elegans* Staining**

139 To perform basic imaging using staining, *C. elegans* was extracted from the NGM plate using  
140 M9 solution. The sample was then centrifuged at a speed of 2000 RPM for 2 minutes, during  
141 which the supernatant was discarded and replaced with a new M9 buffer. The operation was  
142 repeated to eliminate any remaining bacteria, which were transferred to a tube containing 2 mL  
143 of the buffer solution. A 60 μM dye concentration was introduced into the buffer solution  
144 containing the worms. The mixture was then incubated at 20 °C for 6 hours. Following this,  
145 the worms were subjected to two additional rounds of centrifugation with M9, as outlined in  
146 the methodology above, to eliminate any artifacts. After this, a volume of 10 μL was extracted  
147 from the resulting pellet using a pipette and then deposited onto a 2% agar pad to prevent  
148 desiccation. In order to render the worms immobile for imaging purposes, a concentration of  
149 10 μM sodium azide (MERCK-769320) was introduced into the agar before creating the pad.  
150 A cover slip was placed on the pad to prepare the worms for imaging<sup>5</sup>.

151 For staining of the intestinal lumen (60 μM of the dye was added), to 1 ml bacteria OP50 and  
152 plated onto the 60 mm NGM plates. Age-synchronized worms are added to this plate and  
153 allowed to grow for 24 hours. After this, the animals were washed from the plate with the help  
154 of M9 buffer and centrifuged twice at 2000 RPM for 2 minutes to remove artifacts. 10 μL was  
155 extracted from the pellet and placed on an agar pad containing sodium azide as per the protocol

156 mentioned above to immobilize the worms. A coverslip was then added on top before  
157 proceeding with imaging<sup>6,7</sup>.

### 158 Synthesis route of Cy-Cl probe:

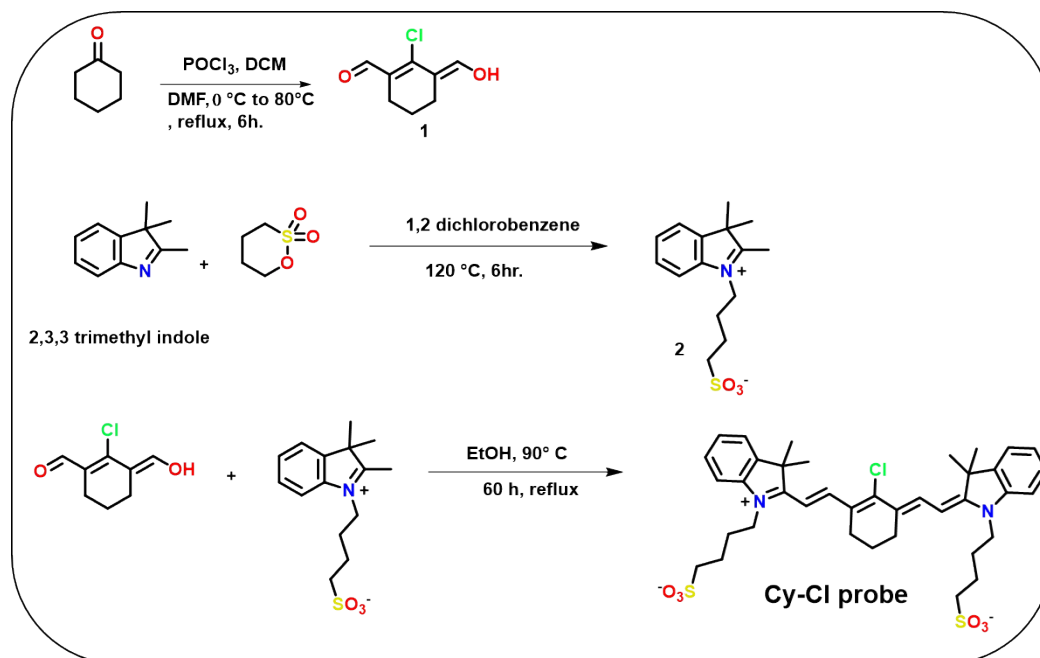

Scheme S1: Synthesis protocol of Cy-Cl probe.

159

### 160 Synthetic Procedure of Cy-Cl probe:

#### 161 Synthesis of compound 1:

162 DMF (10 mL) and dichloromethane (10 mL) were mixed in the ice bath condition, and then  
163  $\text{POCl}_3$  (10 mL) was added drop by drop with the help of a dropping funnel. After stirring for  
164 30 min, 4.0 g cyclohexanone was added and refluxed at  $80\text{ }^\circ\text{C}$ . After 6 hours, the mixture was  
165 poured into the ice cold water to get the yellow solid product after that, the product was filtered  
166 by a Buchner funnel and dried on rota vapor. Further, the product formation was confirmed by  
167  $^1\text{H-NMR}$  spectroscopy (Yield: 2.8 gm; 39.82%).

#### 168 Synthesis of compound 2

169 1 equivalent of 2,3,3-trimethylindole (5.0 gm, 31.40 mmol) and 1, 4-butyldisulfonate (3.3 mL,  
170 31.40 mmol) were mixed in 20 mL of 1, 2-dichlorobenzene. The mixture was refluxed at 120  
171  $^\circ\text{C}$  for 6 hours. After the completion of the reaction, it was poured into iced acetone for  
172 extraction and washed several times with acetone to obtain the product as a light pink solid in

173 color. The product formation was further confirmed by the  $^1\text{H}$ -NMR spectroscopy (Yield: 7.0  
174 gm; 64.40%).

### 175 Synthesis of probe Cy-Cl:

176 Compound 1 (300 mg, 1.7 mmol) and Compound 2 (1.014 gm, 3.43 mmol) were dissolved in  
177 anhydrous ethanol and refluxed at  $90\text{ }^\circ\text{C}$  for 60 hours to produce dark green solids. The reaction  
178 mixture evaporated on rota vapor to remove all solvents. The compound was purified by  
179 column chromatography with a 20% DCM-MeOH solvent system to get the final product as  
180 Cy-Cl probe<sup>8,9</sup> (Yield: 500 mg; 39.68%).

181  $^1\text{H}$  NMR of Compound 1 ((E)-2-chloro-3-(hydroxymethylene)cyclohex-1-ene-1-  
182 carbaldehyde) (500 MHz,  $\text{DMSO-}d_6$ ):  $\delta$  10.81 (s, 1H), 10.02 (s, 1H), 7.47 (s, 1H), 2.41 –  
183 2.21 (t, 4H), 1.52 (p, 2 H  $J = 5.7$  Hz)

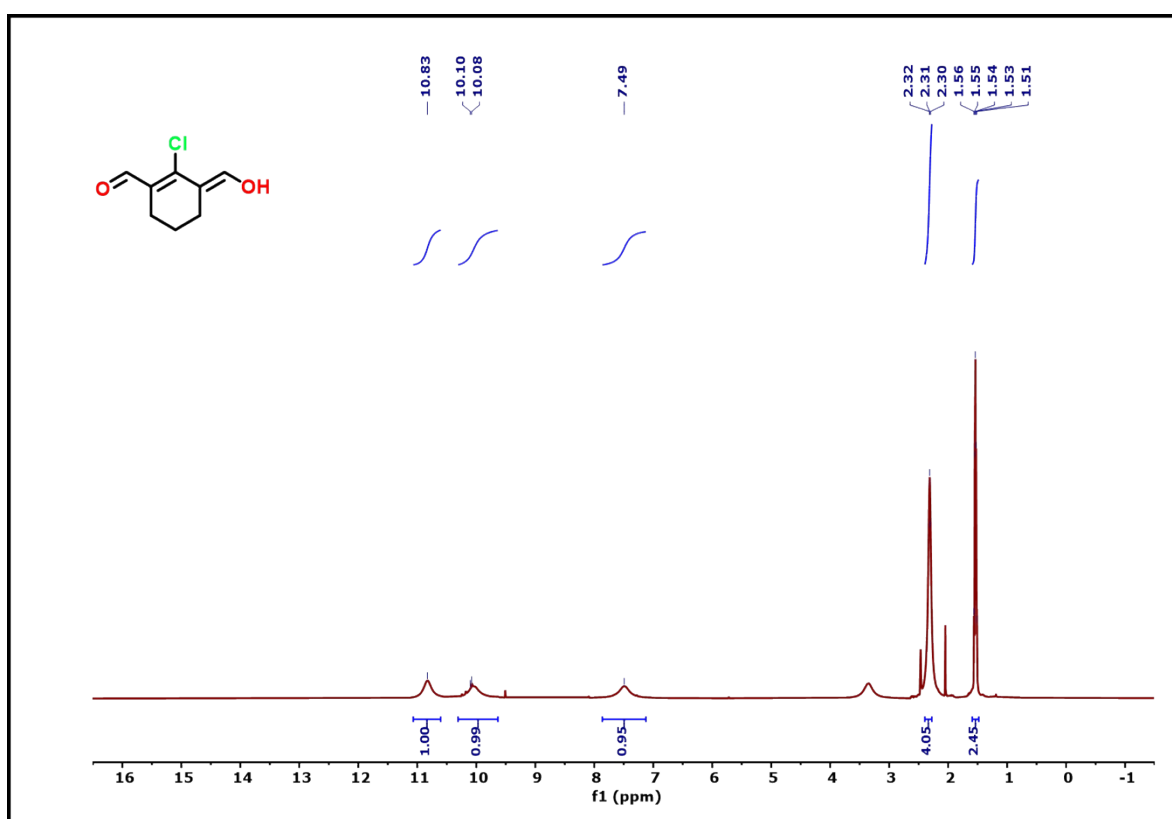

Figure S1:  $^1\text{H}$  NMR (E)-2-chloro-3-(hydroxymethylene)cyclohex-1-ene-1-carbaldehyde (500 MHz,  $\text{DMSO-}d_6$ )

184  $^1\text{H}$  NMR of Compound 2 (4-(2,3,3-trimethyl-3H-indol-1-ium-1-yl)butane-1-sulfonate)  
185 (500 MHz,  $\text{CDCl}_3$ )  $\delta$  7.83 (d,  $J = 7.3$  Hz, 1H), 7.57 – 7.48 (m, 3H), 4.83 – 4.75 (t, 2H), 3.04  
186 (s, 3H), 2.91 (t,  $J = 6.8$  Hz, 2H), 2.20 – 2.11 (m, 2H), 2.05 – 1.99 (m, 2H), 1.58 (s, 6H).

187

188

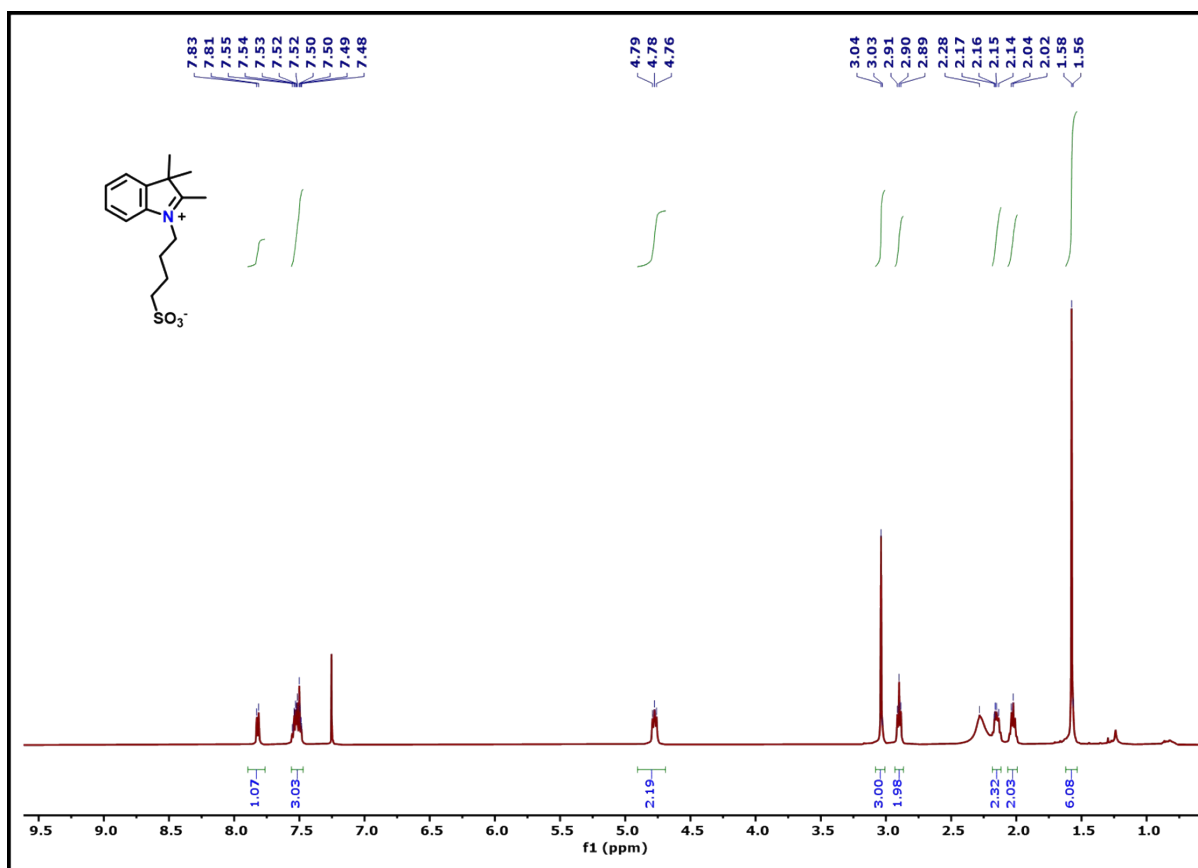

189

190 **Figure S2:**  $^1\text{H}$  NMR of 4-(2,3,3-trimethyl-3H-indol-1-ium-1-yl)butane-1-sulfonate ( $\text{CDCl}_3$ , 500 MHz)

191

192  $^1\text{H}$  NMR of Cy-Cl probe (500 MHz,  $\text{CD}_3\text{OD}$ )  $\delta$  8.22 (dd,  $J = 13.9$  Hz, 2H), 7.59 (d,  $J = 7.4$   
 193 Hz, 2H), 7.45 (d,  $J = 7.9$  Hz, 2H), 7.38 (dd,  $J = 7.7$  Hz, 2H), 7.24 (dd,  $J = 7.3$  Hz, 2H), 6.34  
 194 (dd,  $J = 14.3$  Hz, 2H), 4.18 (t,  $J = 7.5$  Hz, 4H), 2.69 (t,  $J = 6.2$  Hz, 4H), 2.46 (m, 4H), 1.79 (tq,  
 195  $J = 22.7, 7.4, 6.6$  Hz, 6H), 1.70 (m,  $J = 7.3$  Hz, 4H), 1.63 (s, 12H).



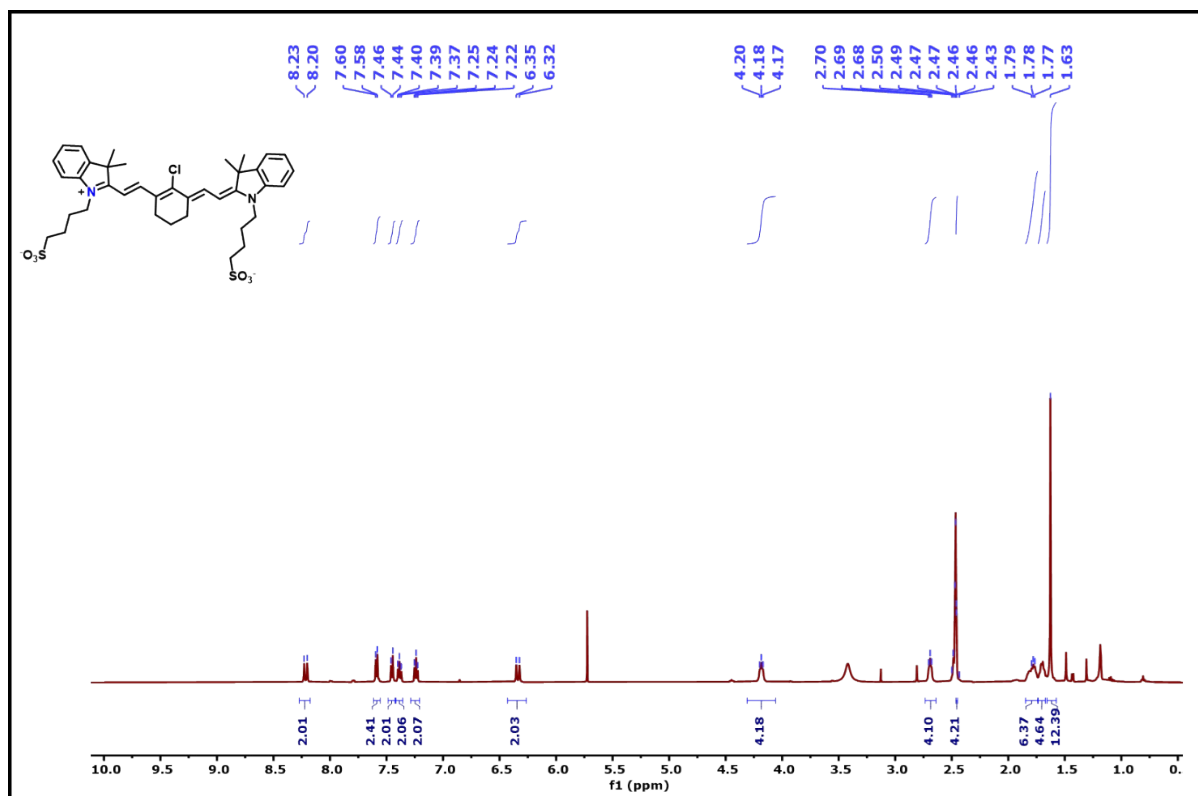

Figure S3: <sup>1</sup>H NMR of Cy-Cl probe (CD<sub>3</sub>OD, 500 MHz)

196

197 <sup>13</sup>C NMR of Cy-Cl probe (500 MHz, CD<sub>3</sub>OD): δ 181.6, 157.4, 152.5, 151.6, 150.5, 138.1,  
 198 135.8, 134.6, 131.9, 121.1, 111.2, 64.4, 60.2, 58.4, 53.3, 39.9, 38.5, 37.0, 35.6, 35.4, 32.0,  
 199 31.55, 31.5, 29.9

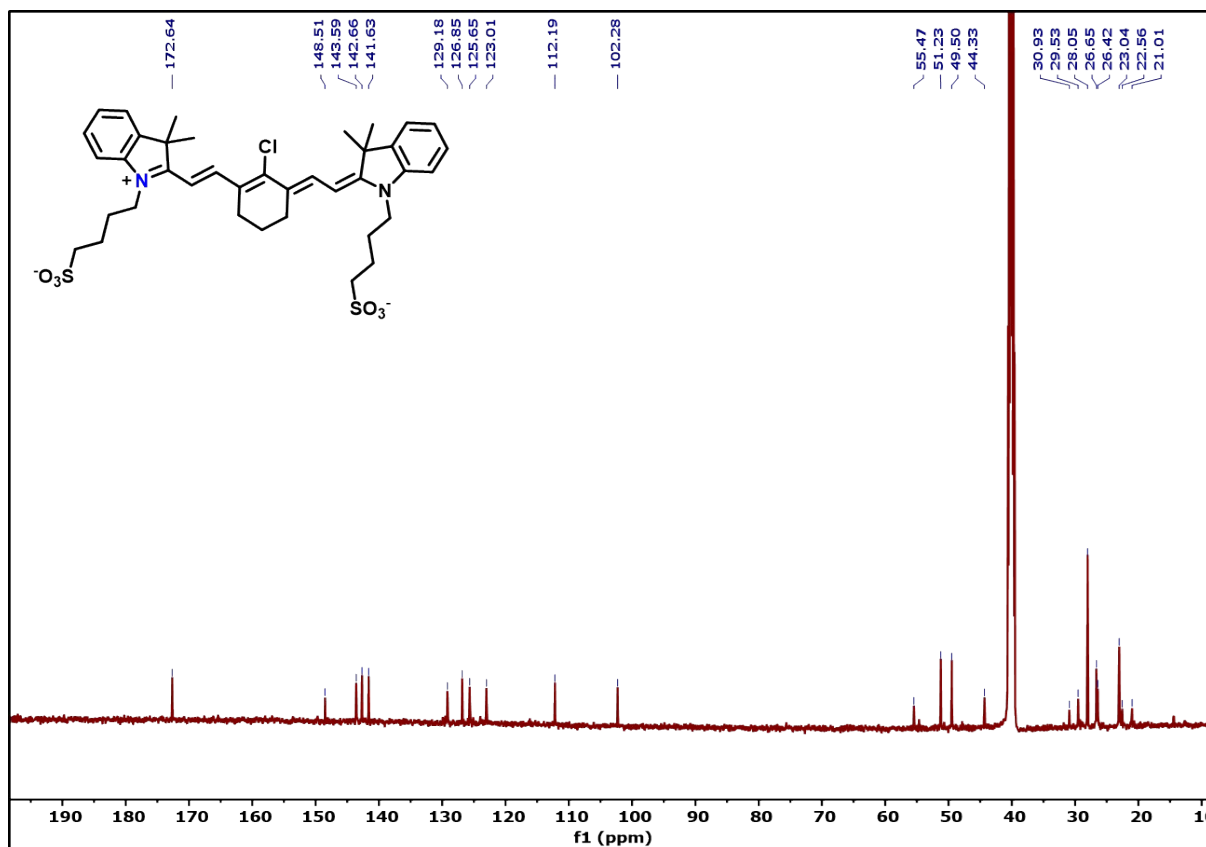

Figure S4:  $^{13}\text{C}$  NMR of Cy-Cl Probe ( $\text{CDCl}_3$ , 500 MHz)

200

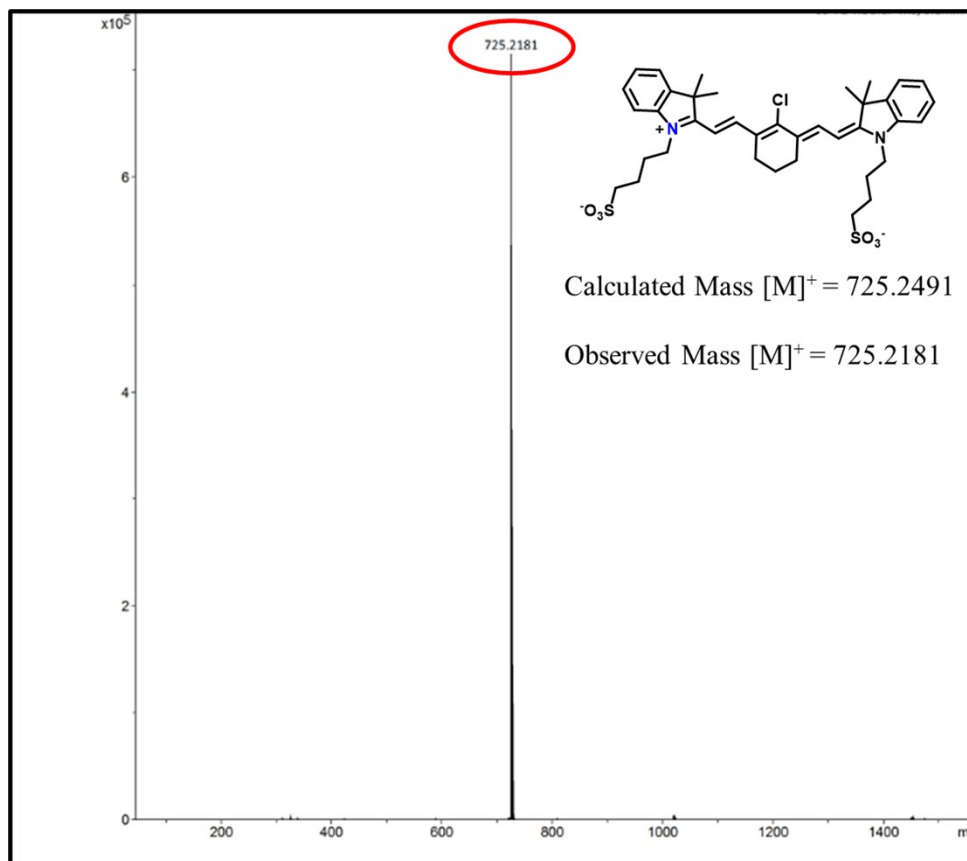

**Figure S5:** Mass spectra of the Cy-Cl probe (Calculated Mass = 725.2491, Observed mass = 725.2181)

201

202

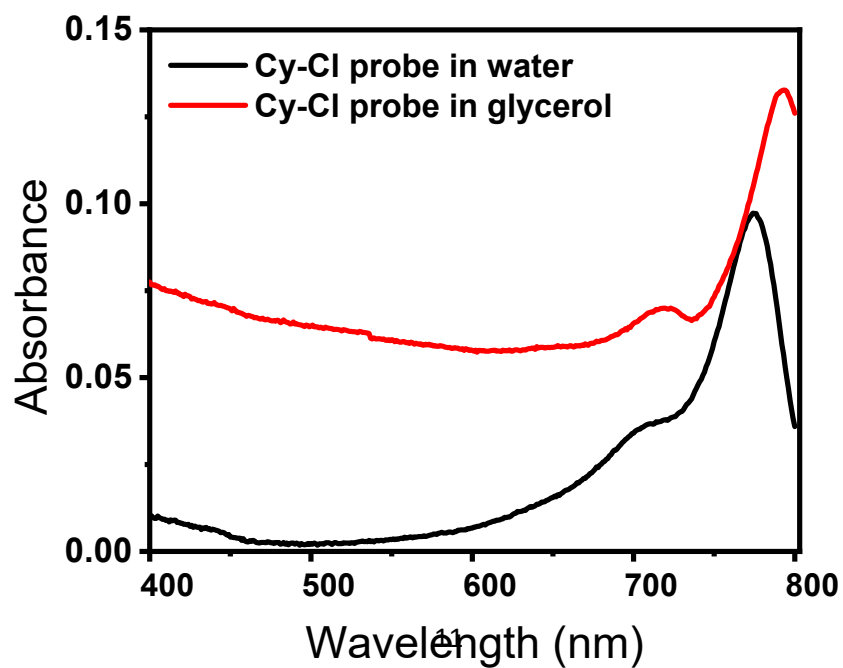

**Figure S6:** Absorption spectra of Cy-Cl probe in water and glycerol medium. A 10 nm red shift in glycerol showed the possibility of J-type aggregation.

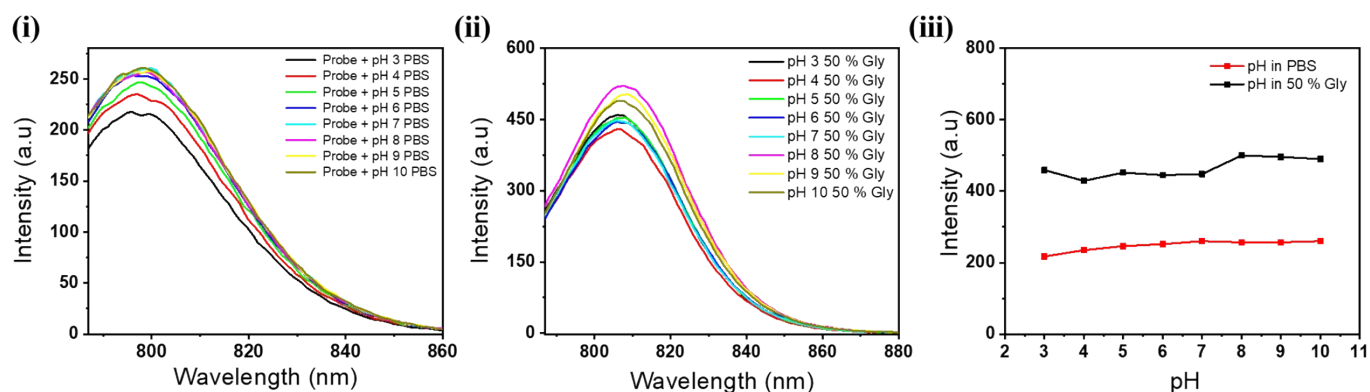

**Figure S7:** Fluorescence response of Cy-Cl probe in different viscosity at various pH (i) in 0% Glycerol-PBS (ii) 50 % Glycerol PBS mixture (iii) is the maximum fluorescence intensity at various pH.

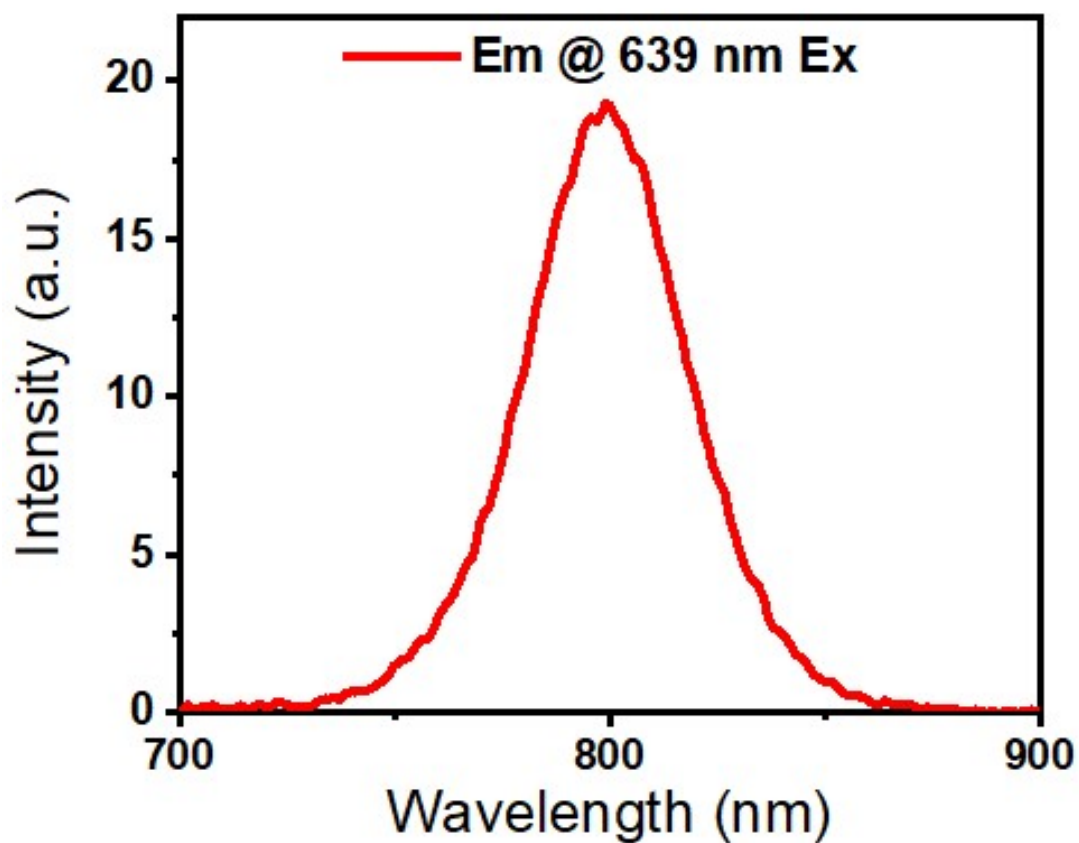

**Figure S8:** The Cy-Cl probe exhibits significant emission when excited at 639 nm, indicating that a 639 nm laser source is suitable for bioimaging.

204  
205

| <b>Cy-Cl<br/>(Viscosity)</b> | <b><math>\tau_1</math> (ns)</b> | <b><math>\tau_2</math>(ns)</b> | <b><math>\tau_3</math> (ns)</b> | <b><math>A_1</math>(%)</b> | <b><math>A_2</math> (%)</b> | <b>Average<br/>Lifetime<br/>(ns)</b> |
|------------------------------|---------------------------------|--------------------------------|---------------------------------|----------------------------|-----------------------------|--------------------------------------|
| Water only                   | 0.02173                         | 0.1772                         | 0.5303                          | 99.97                      | 0.03                        | 0.02173                              |
| 10% gly+water                | 0.01389                         | 0.1977                         | 0.5969                          | 100                        | 0.00                        | 0.01389                              |
| 20% glyc+water               | 0.2311                          | 0.4954                         | -                               | 90.21                      | 9.79                        | 0.2438                               |
| 30% gly+water                | 0.2454                          | 0.4373                         | -                               | 81.68                      | 18.32                       | 0.2669                               |
| 40% gly+water                | 0.2950                          | 0.4728                         | -                               | 75.77                      | 24.23                       | 0.3246                               |
| 50% gly+water                | 0.3469                          | 0.5084                         | -                               | 65.02                      | 34.98                       | 0.3903                               |

**Table S1: (a)** The fluorescence lifetime of the Cy-Cl probe in a water-glycerol mixture increases, indicating the probe response towards viscosity changes.

206

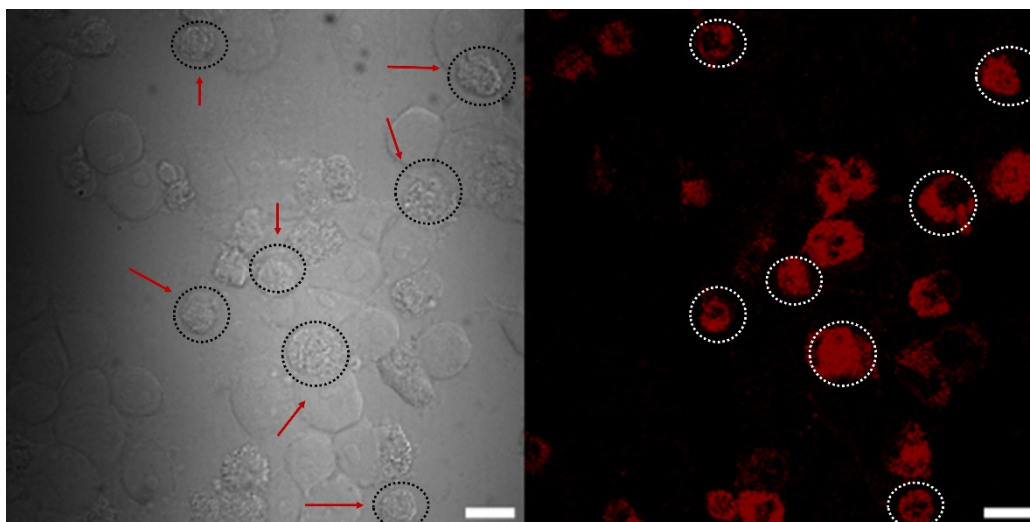

**Figure S9:** The Cy-Cl probe specifically stains dead cells, which are marked as black circles in the TD image, while white circles indicate emissions from the dead cells in the red region of the right image. (Scale bar: 25  $\mu\text{m}$ )

207

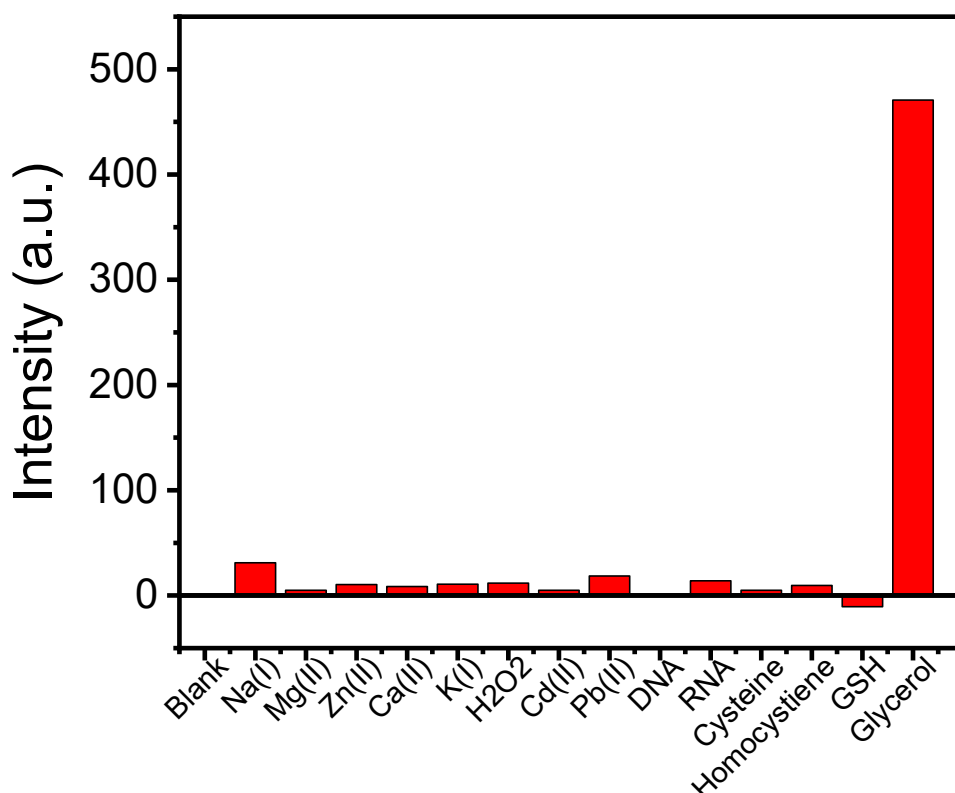

**Figure S10:** The fluorescence bar plot illustrates the Cy-Cl probe's response to metal ions and biomolecules, indicating that fluorescence is primarily influenced by the viscosity of the medium.

208

209

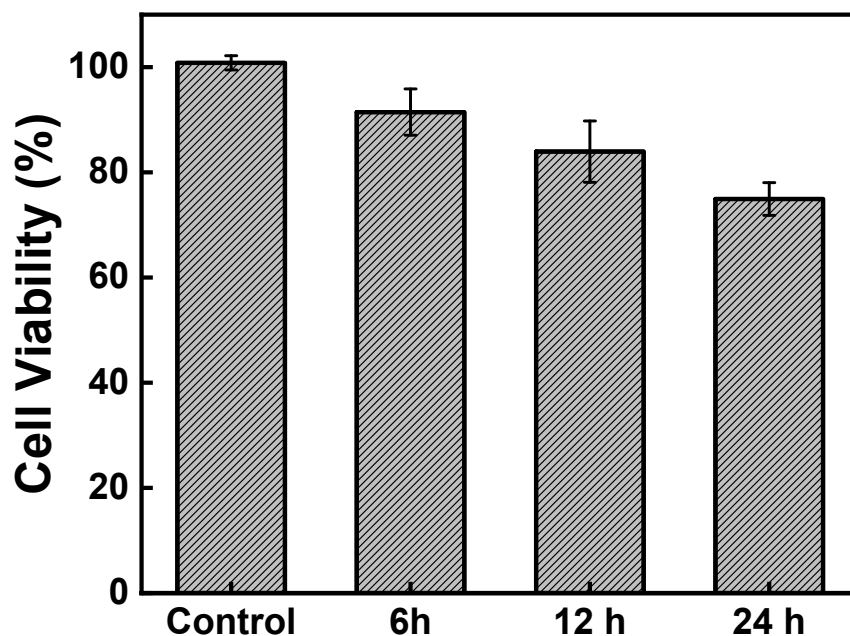

**Figure S11:** Cellular cytotoxicity experiment of Cy-Cl probe at 6 hours, 12 hours, and 24 hours respectively in HeLa cells. The result shows that ~80% cell viability even after 24 hours of Cy-Cl treatment.

210

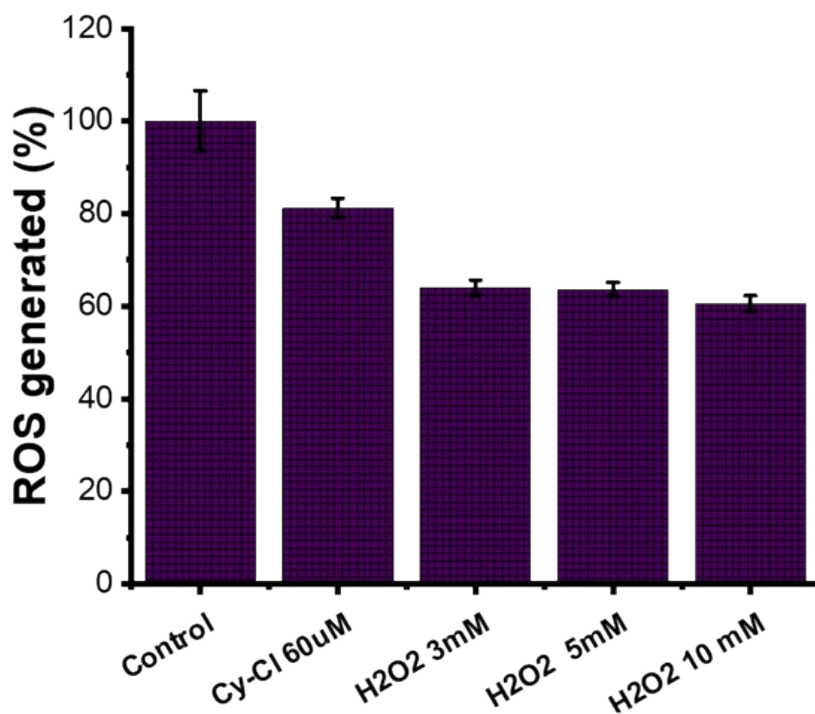

**Figure S12:** Spectrophotometric estimation of ROS generation against H<sub>2</sub>O<sub>2</sub> confirms the initiation of the apoptosis process.

211

212

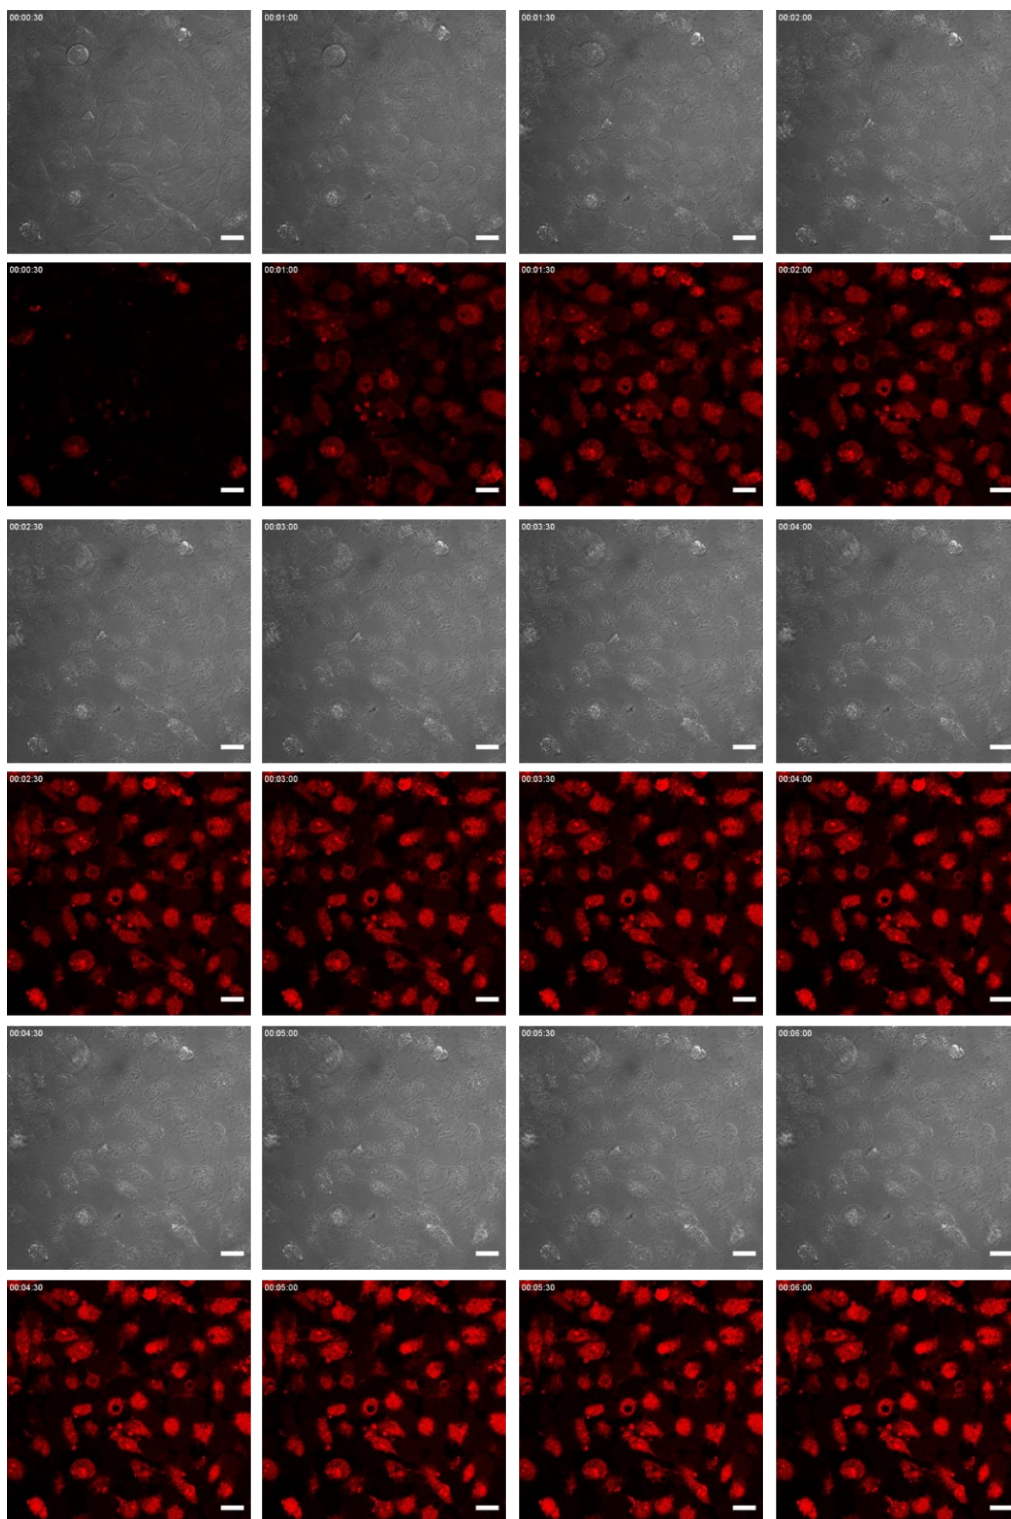

**Figure S13:** The live imaging of dead and live HeLa cells using the Cy-Cl probe (60  $\mu\text{M}$ ), followed by the addition of 10 mM  $\text{H}_2\text{O}_2$  for 6 hours, demonstrates the probe's capability for long-term tracking of dead cells. (Scale bar: 25  $\mu\text{m}$ )

213  
214



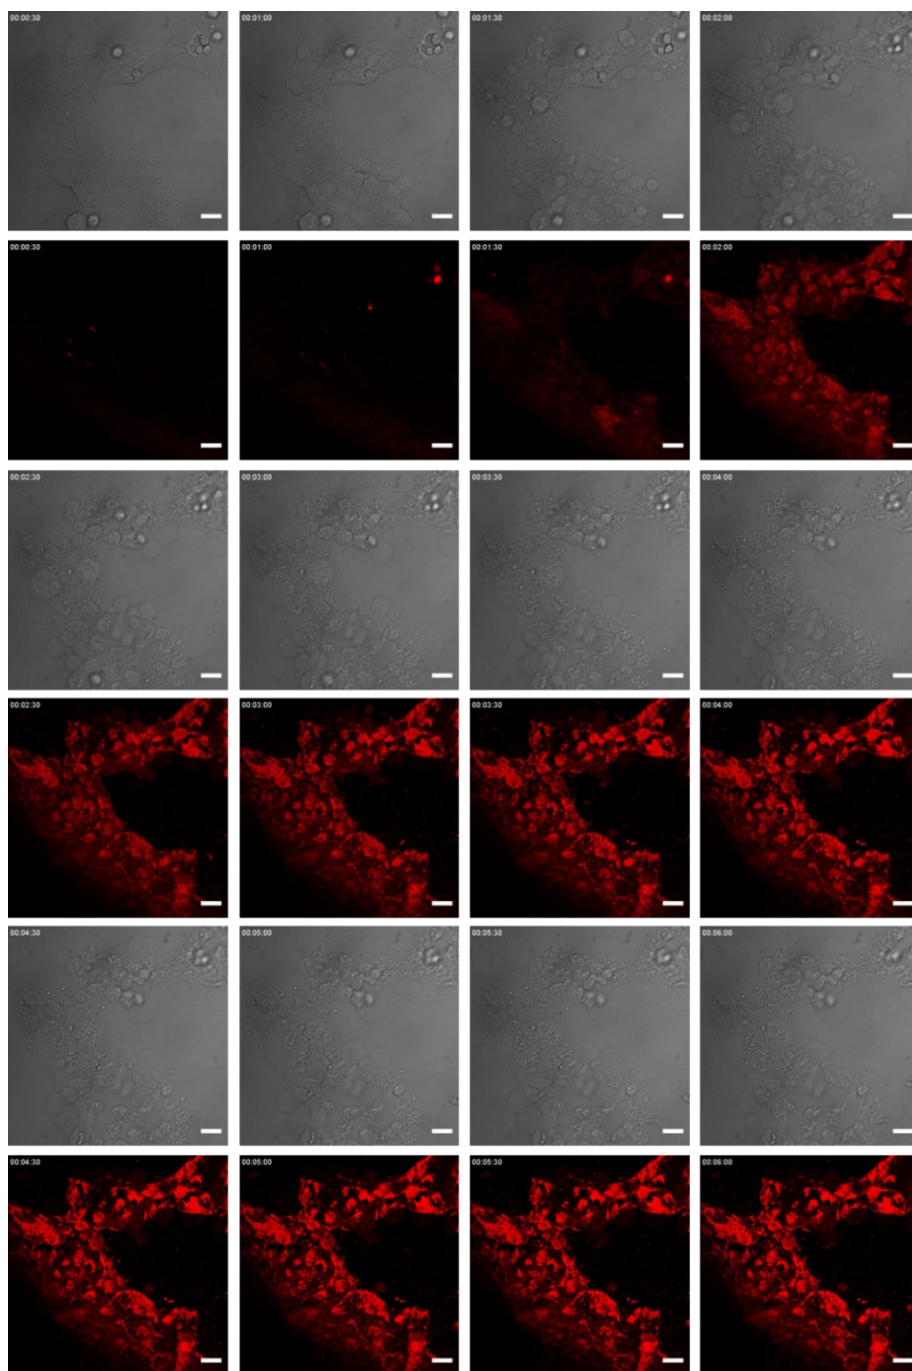

**Figure S14:** The live imaging of dead and live HEK 293A cells using the Cy-Cl probe (60  $\mu\text{M}$ ), followed by the addition of 10 mM  $\text{H}_2\text{O}_2$  for 6 hours, demonstrates the probe's capability for long-term tracking of dead cells. (Scale bar: 25  $\mu\text{m}$ )

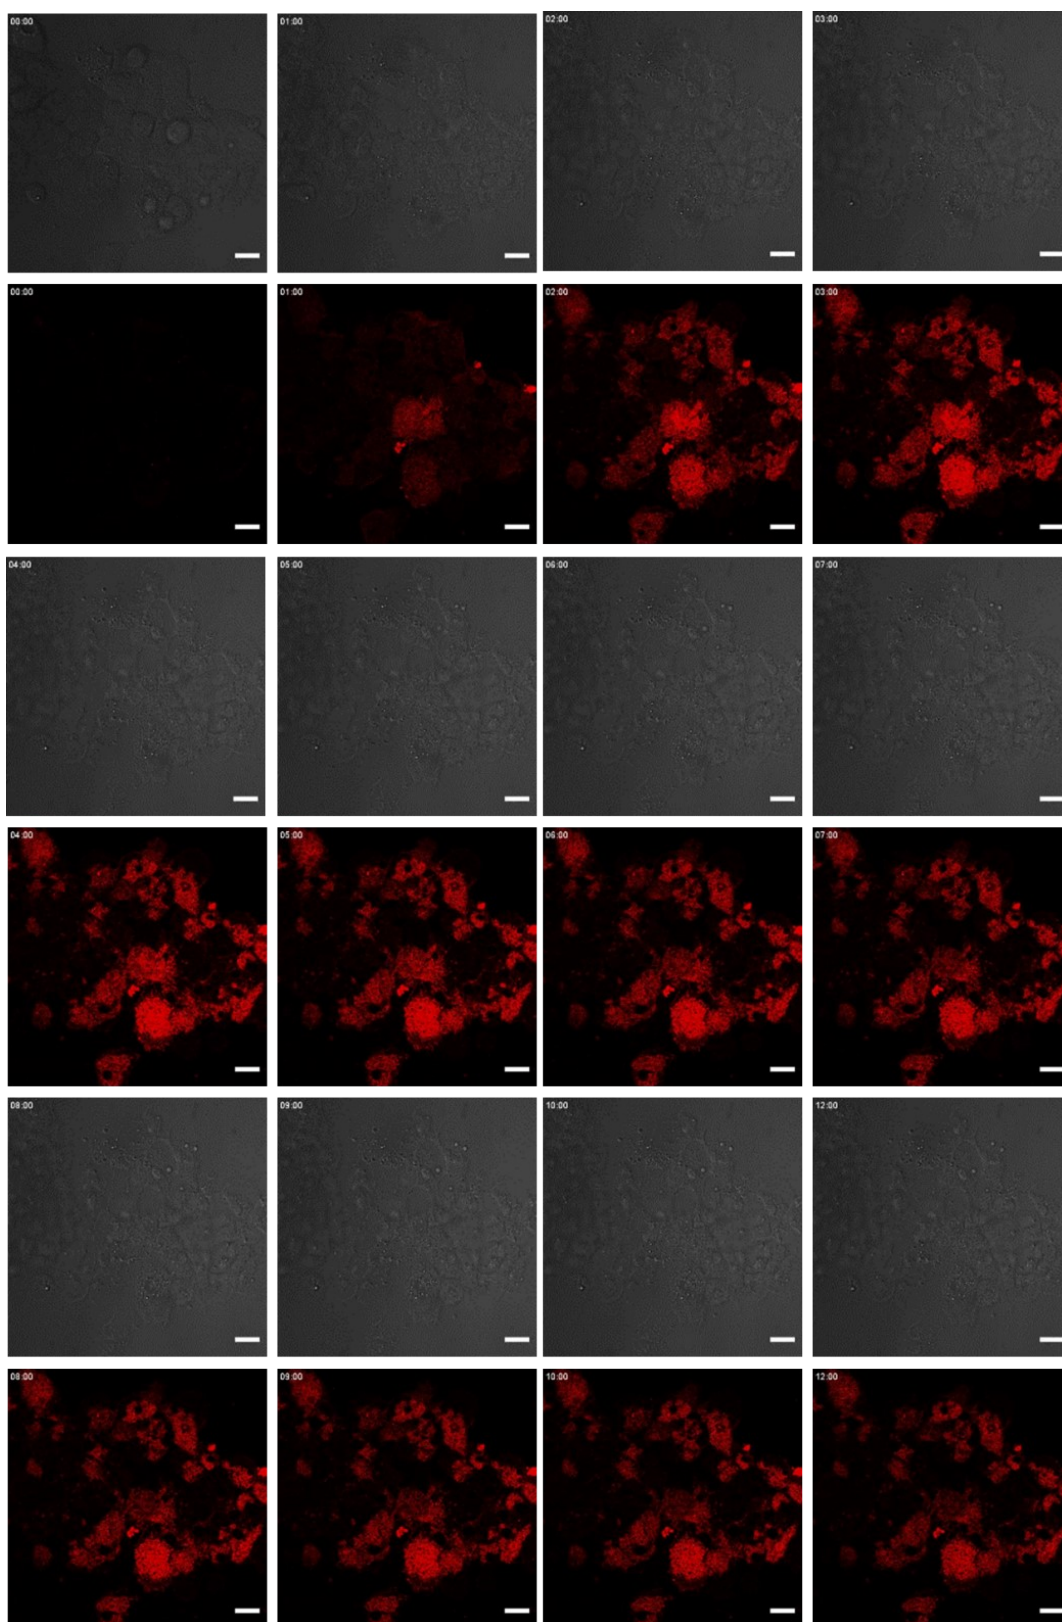

**Figure S15:** The live imaging of dead and live HepG 2 cells using the Cy-C1 probe (60  $\mu$ M), followed by the addition of 10 mM  $H_2O_2$  for 12 hours, demonstrates the probe's capability for long-term tracking of dead cells. (Scale bar: 25  $\mu$ m)

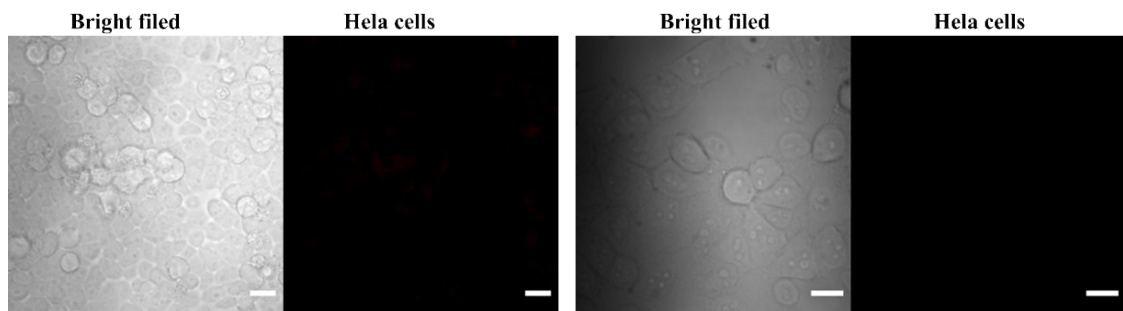

**Figure S16:** Fixed HeLa cells treated with 0.1% Triton X-100 for pore formation incubated with Cy-Cl probe, Images do not show any emission after fixed cell confocal imaging (Scale bar: 25  $\mu$ m).

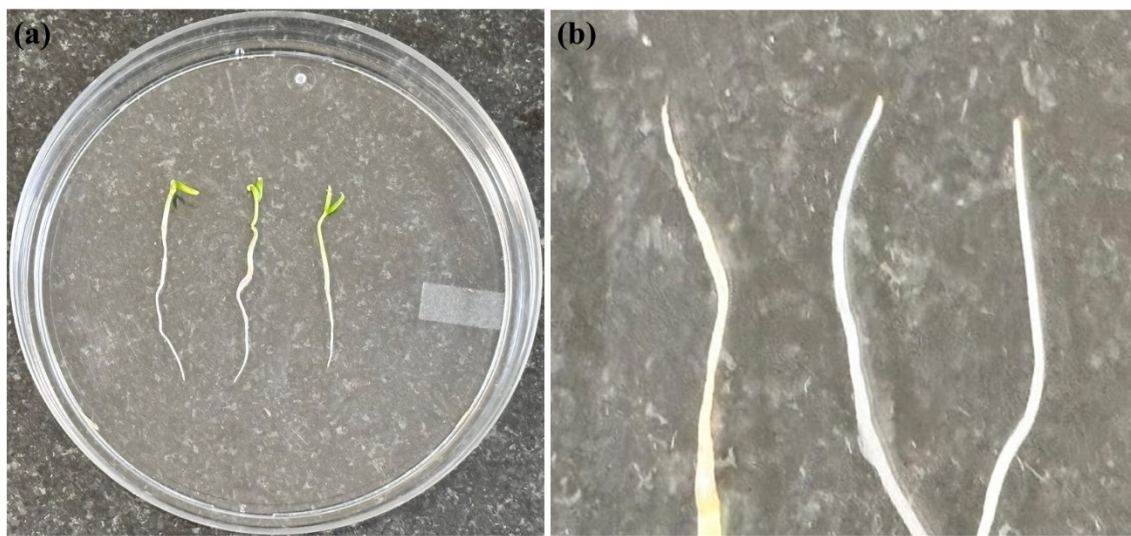

**Figure S17:** (a) The root image of tomato seedlings used for dead cell study. (b) The zoomed image of (a) tomato plant root

219 **References:**

- 220 1 J. Lim, J. Lee, Y. Boo and W. J. Kim, *Nanoscale*, 2023, **16**, 742–751.
- 221 2 J. Liu, C. Lou, C. Zhen, Y. Wang, P. Shang and H. Lv, *Metallomics*, ,  
222 DOI:10.1093/mtomcs/mfac027.
- 223 3 H. Li, W. Shi, X. Li, Y. Hu, Y. Fang and H. Ma, *J. Am. Chem. Soc.*, 2019, **141**,  
224 18301–18307.
- 225 4 M. Adamiec-Organisciok, M. Wegrzyn, L. Cienciala, D. Sojka, J. Nackiewicz and M.  
226 Skonieczna, *Pharmaceuticals*, 2023, **16**, 1–14.
- 227 5 M. Rahimi, S. Sohrabi and C. T. Murphy, *Biophys. J.*, 2022, **121**, 515–524.
- 228 6 A. Bidaud-Meynard, F. Demouchy, O. Nicolle, A. Pacquelet, S. K. Suman, C. N.  
229 Plancke, F. B. Robin and G. Michaux, *Dev.*, 2021, **148**, 1–8.
- 230 7 T. Saito, K. Kikuchi and T. Ishikawa, *Biochem. Biophys. Res. Commun.*, 2024, **706**,  
231 149762.
- 232 8 N. Zhou, F. Huo, Y. Yue and C. Yin, *J. Am. Chem. Soc.*, 2020, **142**, 17751–17755.
- 233 9 A. Samanta, M. Vendrell, R. Das and Y. T. Chang, *Chem. Commun.*, 2010, **46**, 7406–  
234 7408.
